# Supplementary material for: X-CNV: genome-wide prediction of the pathogenicity of copy number variations
Source: PubMed Central journal article supplement (PMC8375180; doi:10.1186/s13073-021-00945-4), 2021-08-18

Figure S1. The cancer predisposition genes (CPGs) located within the pathogenic CNVs and their corresponding phenotypes

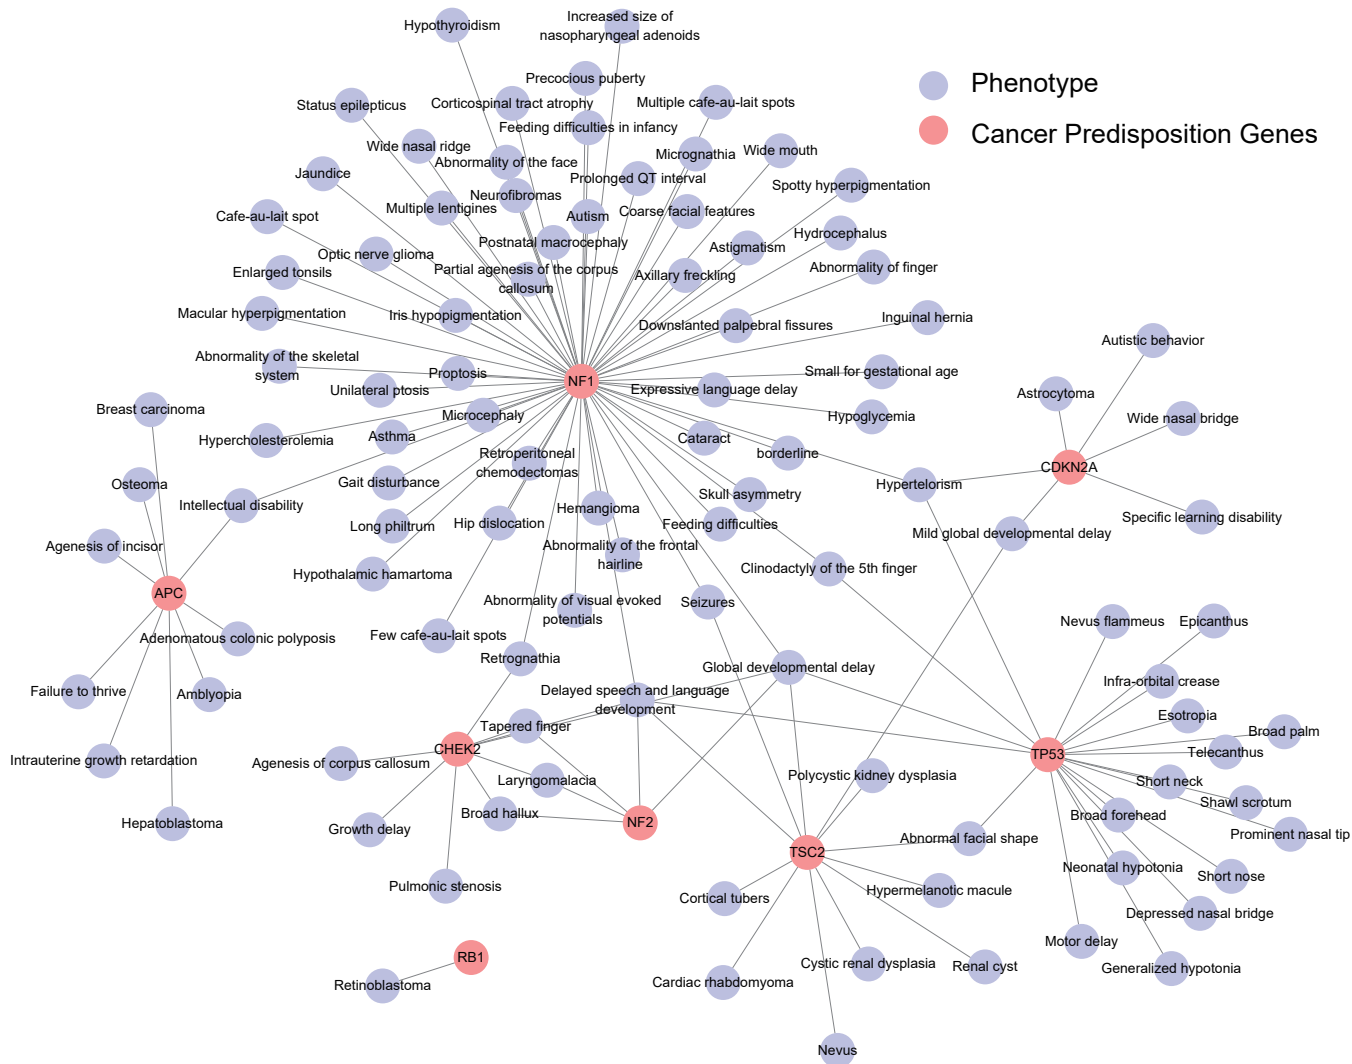

Supplement: 13073_2021_945_MOESM2_ESM.pdf [file 13073_2021_945_MOESM2_ESM.pdf]
